# Supplementary material for: Seroepidemiological study of SARS-CoV-2 infection in East Java, Indonesia
Source: PubMed Central journal article supplement (PMC8101714; doi:10.1371/journal.pone.0251234), 2021-05-06
Supplement: pone.0251234.s001.pdf [file pone.0251234.s001.pdf]

10. Riwayat kunjungan ke rumah sakit, puskesmas, klinik, atau fasilitas kesehatan lainnya sejak Desember 2019:

Tidak

Ya

Jika “ya”;

Nama fasilitas kesehatan :

Frekuensi, waktu, dan durasi :

Tujuan :

11. Riwayat kontak langsung dengan orang yang suspek ataupun positif COVID-19:

Tidak

Ya

Jika “ya”;

Waktu, frekuensi, dan durasi terjadinya kontak :

12. Riwayat *swab test* COVID-19:

Tidak

Ya

Jika “ya”;

Frekuensi pemeriksaan :

Waktu pemeriksaan :

Hasil :

Alasan / Indikasi :

Gejala :

Tidak ada

Ada

Jika “ada” gejala;

Demam ( °C),  batuk,  sakit tenggorokan,

pilek/hidung tersumbat,  letih,  sesak nafas,

pneumonia,  lainnya ( )

13. Riwayat rawat inap di rumah sakit akibat COVID-19:

Tidak

Ya

Jika “ya”;

Nama fasilitas kesehatan :

Waktu dan durasi :



10. History of visiting hospitals, primary health centers, clinics or other health facilities since December 2019:

No

Yes

If “yes”;

Name of health facility :

Frequency, time and duration :

Purpose :

11. History of direct contact with suspected or COVID-19 cases:

No

Yes

If “yes”;

Time, frequency and duration of contact :

12. History of COVID-19 *swab test*:

No

Yes

If “yes”;

Examination frequency :

Time of examination :

Result :

Indication :

Symptoms :

No

Yes

If “yes” for symptoms;

Fever ( °C),  cough,  sore throat,

runny/congested nose,  fatigue,  shortness of breath,

pneumonia,  others ( )

13. History of hospitalization due to COVID-19:

No

Yes

If “yes”;

Name of health facility :

Time and duration :
